# Supplementary material for: InSaccharomyces cerevisiae, yKu and Subtelomeric Core X Sequences Repress Homologous Recombination Near Telomeres as Part of the Same Pathway
Source: Oxford University Press journal article supplement (doi:10.1534/genetics.109.106674), 2009-08-04
Supplement: 106674_si.pdf [file 106674_si.pdf]

# GENETICS

Supporting Information

<http://www.genetics.org/cgi/content/full/genetics.109.106674/DC1>

**In *Saccharomyces cerevisiae*, yKu and Subtelomeric Core X Sequences Repress Homologous Recombination Near Telomeres as Part of the Same Pathway**

**Marcus E. Marvin, Craig D. Griffin, David E. Eyre, David B. H. Barton  
and Edward J. Louis**

Copyright © 2009 by the Genetics Society of America  
DOI: 10.1534/genetics.109.106674

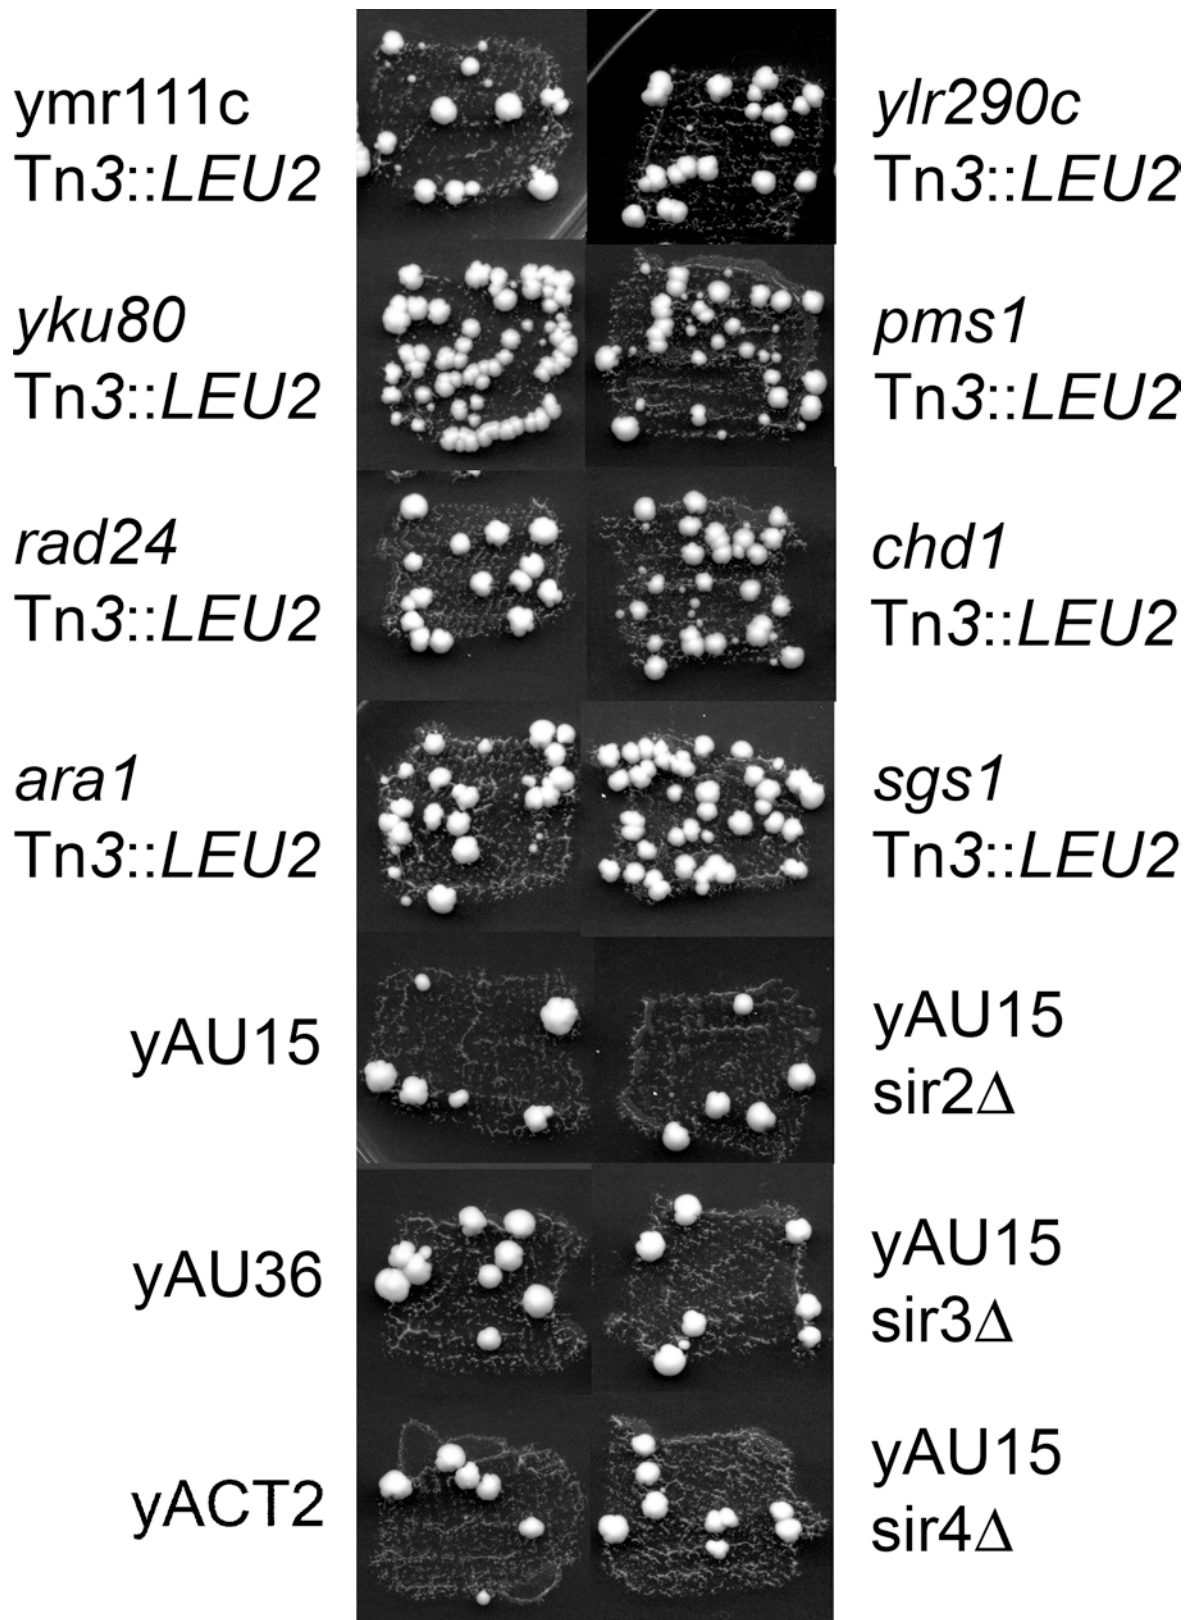

FIGURE S1.— Examples of some of the strains carrying transposon tagged alleles that confer elevated recombination in our genetic screen using strain *yAU15sir3*. It should be noted that strains carrying the *chd1*Tn3::*LEU2* allele only displayed elevated recombination when *SIR3* was also deleted in the genome, whereas the additional alleles shown above, displayed elevated recombination in all *yAU15* derived strains.

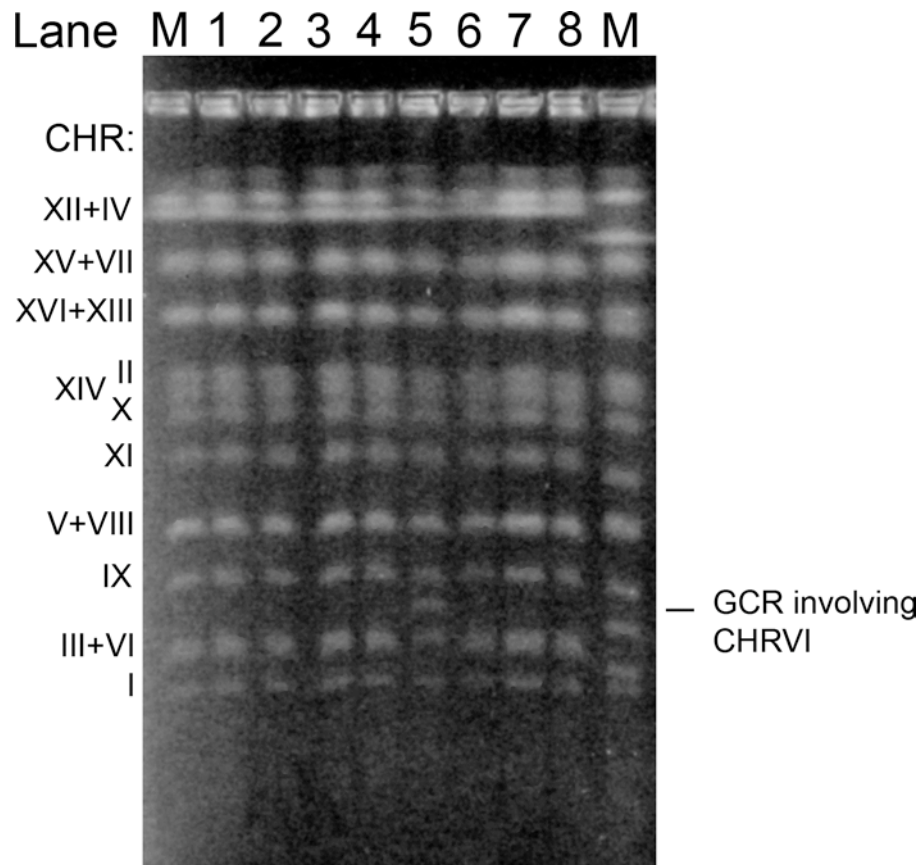

FIGURE S2.—Example of a strain from our genetic screen for hyper-recombination where a translocation involving chromosome VI had occurred. Markers (Lanes M) are the parental strain Y55 on the left hand side and S288C on the right hand side. A gross chromosomal rearrangement (GCR) involving chromosome VI can be observed in lane 5. Y55 chromosome positions on the gel are shown down the left hand side.

**FILE S1**

File S1 is available for download as an Excel file at <http://www.genetics.org/cgi/content/full/genetics.109.106674/DC1>.

**FILE S2**

**GO Annotation Correlation:** Scripts to correlate screened genes with gene ontology (GO) categories were written in Python 2.4 plus the *scipy* module. The GO term hierarchy structure was derived from the file [http://www.geneontology.org/ontology/gene\\_ontology\\_edit.obo](http://www.geneontology.org/ontology/gene_ontology_edit.obo) (revision 5.179, dated Feb 22 2007), which for each GO code gives names, definitions, top-level categories ('biological\_process', 'molecular\_function' or 'cellular\_component') and parent and child GO codes. This tree-like structure was parsed into a Python dictionary (mapping) data structure. *S. cerevisiae* gene information, including GO terms (from the *Ontology\_term* attribute) for each gene, was derived from the GFF3 formatted feature file on SGD: [ftp://genome-ftp.stanford.edu/pub/yeast/chromosomal\\_feature/saccharomyces\\_cerevisiae.gff](ftp://genome-ftp.stanford.edu/pub/yeast/chromosomal_feature/saccharomyces_cerevisiae.gff) (version dated Feb 20 2007). Each GO term in the Python data structure was further decorated with the names of all *S. cerevisiae* genes annotated with that GO term. Those GO terms not used in *S. cerevisiae* annotation were subsequently erased from the mapping. The following terms were defined: the total number of *S. cerevisiae* genes considered (N) and the number of genes highlighted in the screen (n). For each screen the following calculations were performed for each GO term in the data mapping: the total number of *S. cerevisiae* genes assigned to that GO term (D), and that measure as a proportion of the total (D/N); the total number of those genes found in the screen (k), and that measure as a proportion of the total number of genes in the screen (k/n); the ratio k/D; and the probability (p-value) of randomly achieving k hits from a sample size of n when there are a total of D possible hits in the full population size N. *Scipy*'s 'exp' and 'special.gammaln' functions were used to efficiently calculate the hyper-geometric distribution for the determination of this p-value. The same calculations were performed a second time but counting all child GO terms (and associated genes) as part of each parent GO term. The data were exported to Microsoft Excel where GO terms could be ranked by p-value (by either set of calculations), thereby highlighting which GO terms were statistically over-represented within the subpopulation of screened genes.

**FILE S3**

File S3 is available for download as an Excel file at <http://www.genetics.org/cgi/content/full/genetics.109.106674/DC1>

**TABLE S1****Strains and genetic crosses used in this study**

| <sup>1</sup> Haploids (parental) | <sup>2</sup> Genotype                                                         |
|----------------------------------|-------------------------------------------------------------------------------|
| ND9                              | <i>MATa; ura3-52; ade2-101; leu2Δ; TRP1; his4-r; can1-R; CYH2-s; lys2-801</i> |
| ND44                             | <i>MATα; ura3-52; ade2-101; leu2Δ; trp1-h; HIS4; CAN1-s; cyh2-R; lys2-r2</i>  |
| Diploids (crosses)               |                                                                               |
| PCF254 × PCF257                  | XVR Gap 1<(KIURA3::leu2-C) XVR Gap 1<(KIURA3::leu2-B)                         |
| PCF400 × PCF477                  | XVR Gap 3<(KIURA3::leu2-C) XVR Gap 3<(KIURA3::leu2-B)                         |
| PCF406 × PCF480                  | XVR Gap 4<(KIURA3::leu2-C) XVR Gap 4<(KIURA3::leu2-B)                         |
| PCF491 × PCF490                  | XVR Gap 6<(KIURA3::leu2-C) XVR Gap 6<(KIURA3::leu2-B)                         |
| PCF414 × PCF495                  | XVR Gap 7<(KIURA3::leu2-C) XVR Gap 7<(KIURA3::leu2-B)                         |
| PCF417 × PCF499                  | XVR Gap 8<(KIURA3::leu2-C) XVR Gap 8<(KIURA3::leu2-B)                         |
| PCF263 × PCF269                  | XVR Gap 9<(KIURA3::leu2-C) XVR Gap 9<(KIURA3::leu2-B)                         |
| PCF876 × PCF509                  | XVR Site 11<(KIURA3::leu2-C) XVR Site 11<(KIURA3::leu2-B)                     |
| PCF265 × PCF266                  | XVR Site 12<(KIURA3::leu2-C) XVR Site 12<(KIURA3::leu2-B)                     |
| PCF1126 × PCF1120                | XVR Site 11<(KIURA3::leu2-C) XVR Gap 1<(KIURA3::leu2-B)                       |
| PCF1146 × PCF1129                | XVR Site 12<(KIURA3::leu2-C) XVR Gap 1<(KIURA3::leu2-B)                       |
| PCF432 × PCF507                  | XVIL Gap 1<(KIURA3::leu2-C) XVR Gap 1<(KIURA3::leu2-B)                        |
| PCF984 × PCF1022                 | XVIL Site 11<(KIURA3::leu2-C) XVR Site 11<(KIURA3::leu2-B)                    |
| PCF327 × PCF334                  | XVIL Site 12<(KIURA3::leu2-C) XVIL Site 12<(KIURA3::leu2-B)                   |
| PCF437 × PCF504                  | XIIIR Gap 1<(KIURA3::leu2-C) XIIIR Gap 1<(KIURA3::leu2-B)                     |
| PCF524 × PCF1084                 | XIIIR Site 12<(KIURA3::leu2-C) XIIIR Site 12<(KIURA3::leu2-B)                 |
| PCF955 × PCF1013                 | XIIIR Site 12<(KIURA3::leu2-C) XIIIR Site 12<(KIURA3::leu2-B)                 |
| PCF941 × PCF1041                 | XIIIR Site 12<(KIURA3::leu2-C) XIIIR Site 12<(KIURA3::leu2-B)                 |
| PCF367 × PCF359                  | VIIR Site 12<(KIURA3::leu2-C) VIIR Site 12<(KIURA3::leu2-B)                   |
| PCF226 × PCF220                  | XIIIL Site 12<(KIURA3::leu2-C) XIIIL Site 12<(KIURA3::leu2-B)                 |
| PCF382 × PCF373                  | XVIR Site 12<(KIURA3::leu2-C) XVIR Site 12<(KIURA3::leu2-B)                   |

|                   |                                                                                                                                         |
|-------------------|-----------------------------------------------------------------------------------------------------------------------------------------|
| PCF950 × PCF1009  | VR Site 11<(KIURA3::leu2-C) VR Site 11<(KIURA3::leu2-B)                                                                                 |
| PCF1081 × PCF1082 | VR Site 12<(KIURA3::leu2-C) VR Site 12<(KIURA3::leu2-B)                                                                                 |
| PCF1136 × PCF1111 | XVR Gap 1<(KIURA3::leu2-C) XVR Gap 1<(KIURA3::leu2-B) yku70Δ::NatMX4/yku70Δ::NatMX4                                                     |
| PCF1101 × PCF1117 | XVR Site 12<(KIURA3::leu2-C) XVR Site 12<(KIURA3::leu2-B) yku70Δ::NatMX4/yku70Δ::NatMX4                                                 |
| PCF1105 × PCF1138 | XVIL Gap 1<(KIURA3::leu2-C) XVIL Gap 1<(KIURA3::leu2-B) yku70Δ::NatMX4/yku70Δ::NatMX4                                                   |
| PCF1114 × PCF1103 | XVIL Site 12<(KIURA3::leu2-C) XVIL Site 12<(KIURA3::leu2-B) yku70Δ::NatMX4/yku70Δ::NatMX4                                               |
| PCF1105 × PCF1111 | XVIL Gap 1<(KIURA3::leu2-C) XVR Gap 1<(KIURA3::leu2-B) yku70Δ::NatMX4/yku70Δ::NatMX4                                                    |
| PCF1136 × PCF1138 | XVR Gap 1<(KIURA3::leu2-C) XVIL Gap 1<(KIURA3::leu2-B) yku70Δ::NatMX4/yku70Δ::NatMX4                                                    |
| PCF1105 × PCF1117 | XVIL Gap 1<(KIURA3::leu2-C) XVR Site 12<(KIURA3::leu2-B) yku70Δ::NatMX4/yku70Δ::NatMX4                                                  |
| PCF1101 × PCF1138 | XVR Site 12<(KIURA3::leu2-C) XVIL Gap 1<(KIURA3::leu2-B) yku70Δ::NatMX4/yku70Δ::NatMX4                                                  |
| PCF1114 × PCF1111 | XVIL Site 12<(KIURA3::leu2-C) XVR Gap 1<(KIURA3::leu2-B) yku70Δ::NatMX4/yku70Δ::NatMX4                                                  |
| PCF1136 × PCF1103 | XVR Gap 1<(KIURA3::leu2-C) XVIL Site 12<(KIURA3::leu2-B) yku70Δ::NatMX4/yku70Δ::NatMX4                                                  |
| PCF1114 × PCF1117 | XVIL Gap 1<(KIURA3::leu2-C) XVR Site 12<(KIURA3::leu2-B) yku70Δ::NatMX4/yku70Δ::NatMX4                                                  |
| PCF1101 × PCF1103 | XVR Site 12<(KIURA3::leu2-C) XVIL Site 12<(KIURA3::leu2-B) yku70Δ::NatMX4/yku70Δ::NatMX4                                                |
| PCF1101 × PCF1111 | XVR Site 12<(KIURA3::leu2-C) XVR Gap 1<(KIURA3::leu2-B) yku70Δ::NatMX4/yku70Δ::NatMX4                                                   |
| PCF1136 × PCF1117 | XVR Gap 1<(KIURA3::leu2-C) XVR Site 12<(KIURA3::leu2-B) yku70Δ::NatMX4/yku70Δ::NatMX4                                                   |
| PCF1114 × PCF1138 | XVIL Gap 1<(KIURA3::leu2-C) XVIL Gap 1<(KIURA3::leu2-B) yku70Δ::NatMX4/yku70Δ::NatMX4                                                   |
| PCF1105 × PCF1103 | XVIL Gap 1<(KIURA3::leu2-C) XVIL Site 12<(KIURA3::leu2-B) yku70Δ::NatMX4/yku70Δ::NatMX4                                                 |
| PCF1146 × PCF1129 | XVR Site 12<(KIURA3::leu2-C; core X-y'acsΔ:: KanMX4) XVR Site 12<(KIURA3::leu2-B; core X-y'acsΔ:: KanMX4)                               |
| PCF1146 × PCF1129 | XVR Site 12<(KIURA3::leu2-C; core X-y'acsΔ:: KanMX4) XVR Site 12<(KIURA3::leu2-B; core X-y'acsΔ:: KanMX4) yku80Δ::NatMX4/yku80Δ::NatMX4 |
| PCF1131 × PCF1153 | XVR Site 12<(KIURA3::leu2-C; Gap 8-y'acsΔ:: KanMX4) XVR Site 12<(KIURA3::leu2-B; Gap 8-y'acsΔ:: KanMX4)                                 |
| PCF1131 × PCF1153 | XVR Site 12<(KIURA3::leu2-C; Gap 8-y'acsΔ:: KanMX4) XVR Site 12<(KIURA3::leu2-B; Gap 8-y'acsΔ:: KanMX4) yku80Δ::NatMX4/yku80Δ::NatMX4   |
| PCF1135 × PCF1119 | XVR Site 12<(KIURA3::leu2-C) XVR Site 12<(KIURA3::leu2-B)                                                                               |
| PCF524 × PCF490   | XIIIIR Site 12<(KIURA3::leu2-C) XVR Gap 6<(KIURA3::leu2-C)                                                                              |
| PCF524 × PCF490   | XIIIIR Site 12<(KIURA3::leu2-C) XVR Gap 6<(KIURA3::leu2-B) yku80Δ::KanMX6/yku80Δ::KanMX6                                                |
| PCF491 × PCF490   | XVR Gap 6<(KIURA3::leu2-C) XVR Gap 6<(KIURA3::leu2-B)                                                                                   |
| PCF491 × PCF490   | XVR Gap 6<(KIURA3::leu2-C) XVR Gap 6<(KIURA3::leu2-B) yku80Δ::KanMX6/yku80Δ::KanMX6                                                     |



|                 |                                                                                          |
|-----------------|------------------------------------------------------------------------------------------|
| PCF876 × PCF509 | XVR Site 11<(KIURA3::leu2-C) XVR Site 11<(KIURA3::leu2-B)                                |
| PCF876 × PCF509 | XVR Site 11<(KIURA3::leu2-C) XVR Site 11<(KIURA3::leu2-B) yku80Δ::KanMX6/yku80Δ::KanMX6  |
| PCF524 × PCF507 | XIIIIR Site 12<(KIURA3::leu2-C) XVR Gap 1<(KIURA3::leu2-B)                               |
| PCF524 × PCF507 | XIIIIR Site 12<(KIURA3::leu2-C) XVR Gap 1<(KIURA3::leu2-B) yku80Δ::KanMX6/yku80Δ::KanMX6 |

---

<sup>1</sup>ND9 and ND44 are the two parental strains that were used for *leu2-C* or *leu2-B* insertions. Following successful insertion of each heteroallele the parental strains were crossed to generate the diploids for analysis of recombination rates. <sup>2</sup>All diploid genotypes are therefore ND9×ND44 and denote insert sites for the *leu2* heteroalleles (see Figure 1A).

**TABLE S2****Primers used in this study**

| Primer            | Sequence (5'→3')                                                   |
|-------------------|--------------------------------------------------------------------|
| LEU2-M1           | CCTAGTTAAGAACCCAACCCAggCCTAAATGGTATTATAATCACCAGC                   |
| LEU2-M2           | GCTGGTGATTATAATACCATTTAGGccTGGGTTGGGTTCTTAAGTAGG                   |
| XVR-GAP 1-F1      | TCAATTAAGGTTCTTGGTAATTTCTATTTCTGAAAAACCAAAACattctgggtagaagatcg     |
| XVR-GAP 1-R1      | TATGATTTTGGTAATTTGAGTCAAATAGTCAATCAATGACTTTTTTgggaataactcaggtatcg  |
| XVR-GAP 2-F1      | AAAGAAAAATAAATTTAATGTATGTATCTATATATATATATATattctgggtagaagatcg      |
| XVR-GAP 2-R1      | TAATAATAACCCAGTTGATTATGGCTATTGTCTGTTTTAAGTGATgggaataactcaggtatcg   |
| XVR-GAP 3-F1      | GATCTTGACATAAATGGCCTATTATAGAGAGTCACGCTGAACACattctgggtagaagatcg     |
| XVR-GAP 3-R1      | AGCTCTAGCAACTTAATGCAGAGAAAGATTTGAAGCTACCGCCGcgggaataactcaggtatcg   |
| XVR-GAP 4-F1      | AATTAATGATACTTATAATAAATTTGATTGAAAATAGTTACCTATTattctgggtagaagatcg   |
| XVR-GAP 4-R1      | TTCATATATATTAAGGAGTTTAACTATATACATATGATTAGGTAgggaataactcaggtatcg    |
| XVR-GAP 5-F1      | TGCAGCAAACAAAAGGGCGAAATAATAGTTACTCCAAAGATGAAattctgggtagaagatcg     |
| XVR-GAP 5-R1      | ATGCCTCCTTCGCAAACGTGTATAGTTTTCCATTTTCTTCTGCCATgggaataactcaggtatcg  |
| XVR-GAP 6-F1      | TCTTCGCCAACTCTATAAAAAGGCTGTACTCCTATAATTAAGTATgggaataactcaggtatcg   |
| XVR-GAP 6-R1      | CACAACTCATAGAAAATAAATACTAGTATGATTCCGGAAATTTattctgggtagaagatcg      |
| XVR-GAP 7-F1      | AAATGTTCTAGCTATTCATTTACCTTCCCGAAAAGCATTCTTCGAattctgggtagaagatcg    |
| XVR-GAP 7-R1      | GCAACGAAGACAGTTCTGAGATGAATGGCAGAAAGAACTGCAGCTgggaataactcaggtatcg   |
| XVR-GAP 8-F1      | TTATCCAAACCGTTGGAGCTTTCCCTTTATTTCTACATAGGTTTCattctgggtagaagatcg    |
| XVR-GAP 8-R1      | AAACAGATCGCCATAAAAAGGAGAAGCTCCGTAGGAGACCGTTTTTCgggaataactcaggtatcg |
| XVR-GAP 9-F1      | TTTTTTCAACTACTGTTACGGTCAAGAACTAATACTGAGGATAAattctgggtagaagatcg     |
| XVR-GAP 9-R1      | TTCAAGACTTTAAATCACTTGTACCAAAATCATTGTTGCGAAAACgggaataactcaggtatcg   |
| XVR-Site11-F1     | ACGTAGATGAGCTATCGATTTTTTCTGCATACCAAGCAAGTTTACattctgggtagaagatcg    |
| XVR-Site11-R1     | ATAGATCACGCTTCAGCCGCTCTGTGTCGACTTTCTTTTCGCCAGgggaataactcaggtatcg   |
| XVR-Site12-F1     | GTATTTCACTGTTTTGATTTAGTGTGTTGTCACGGCAGTAGCGAattctgggtagaagatcg     |
| XVR-Site12-R1     | CTTTTTATAGATTGTCTTTTTATCCTACTCTTTCCACTTGTCTCgggaataactcaggtatcg    |
| XVIL-Gap 1-F1     | GATGTGGTAAAGACAACGAAATACTACGTAAATCATATTTGGTCTGattctgggtagaagatcg   |
| XVIL-Gap 1-R1     | ATTCCATTGCAGTGATTTGATTGGGAGTAAGCTTTTATAAACGAGgggaataactcaggtatcg   |
| XIIIIR-Gap 1-F1   | CATAGCTAAAGGACTATCTGGCTCGGCCATAAGTTTGAAATTTGTattctgggtagaagatcg    |
| XIIIIR-Gap 1-R1   | CTTCGACGATTTAGGTAGGTATAAGGGTTTCCCTATACCTGTATAgggaataactcaggtatcg   |
| XIIIIR-Site12-F1  | ATTGGAGGGTAACGGTTATGGTGCACGATGGGTTGGTGGTAGCAAattctgggtagaagatcg    |
| XIIIIR-Site12-R1  | TGTCCTTTCAACCATAACCGCTCCAACCACCATCCATCTCTCTACgggaataactcaggtatcg   |
| YKU70Δ::KanMX4-F1 | ATGATTTGTTAAGTGACTCTAAGCCTGATTTTAAAACGGGAATATTcgtacgctgcaggtcgac   |
| YKU70Δ::KanMX4-R1 | AAATATTGTATGTAACGTTATAGATATGAAGGATTTCAATCGTCTatcgtatgaattcaggtcgac |
| YKU80Δ::KanMX4-F1 | AGAGTGCAGGACATATGCACAAATAATATATCTCACACCATAATAcgtacgctgcaggtcgac    |
| YKU80Δ::KanMX4-R1 | TAAGTGTGGTGACGAAAACATAACTCAAAGGATGTTAGACCTTTTatcgtatgaattcaggtcgac |
| KIURA3B/C-U2      | CCTGGCAAACGACGATCTTC                                               |
| KIURA3B/C-U3      | CAATGGAACGACAGTACCCTC                                              |
| XVR-GAP 1-A1      | GCCGTATGTTATGGGTGCAAG                                              |
| XVR-GAP 1-A4      | GCTTGCTGACACAGAAGTGAC                                              |
| XVR-GAP 2-A1      | GCATCCTAATGCTGGTCCTAC                                              |
| XVR-GAP 2-A4      | GCTGCAGACATCTCTAATGTG                                              |
| XVR-GAP 3-A1      | CGTGATTTAGCTATCGGAACC                                              |

|                  |                        |
|------------------|------------------------|
| XVR-GAP 3-A4     | CTAATACGGTAGAGTGTGCGAC |
| XVR-GAP 4-A1     | CACTTCCTTGCCTAAAAGCTGG |
| XVR-GAP 4-A4     | CCAGGATACATCATCGTCATC  |
| XVR-GAP 5-A1     | CGTTCCCTCTAGACATCTACAG |
| XVR-GAP 5-A4     | ACGGTTGGTGGTTAACACCTC  |
| XVR-GAP 6-A1     | CATACCCTTGGTTGGTACGAC  |
| XVR-GAP 6-A4     | CCGTTTCGCAGTGTAAACTATG |
| XVR-GAP 7-A1     | CGAAGGTACTACACCTCACCC  |
| XVR-GAP 7-A4     | GGCTTACGAATGAACATGAGC  |
| XVR-GAP 8-A1     | TGTCTTTTAAGAGTGAAGAGCC |
| XVR-GAP 8-A4     | GACAGTGCAGAGTGATTTCTC  |
| XVR-GAP 9-A1     | GGGAAGGCTGTTCCAATCAAG  |
| XVR-GAP 9-A4     | CGTATTGCTAAGCCTATCTCC  |
| XVR-Site11-A1    | CAGAACTGGTGCAATGGATAG  |
| XVR-Site11-A4    | AACTGAGCCTTGCATGCAAAG  |
| XVR-Site12-A1    | CTGCAGATAACACGAGGGTAC  |
| XVR-Site12-A4    | CTCTCGCTGTCATACCTTACC  |
| XIII-L-Site12-A4 | CTTFACTCTCGCTGTCACTCC  |
| XVIR-Site12-A4   | CAAGCCCTGTTGTCTCTTACC  |
| VIIR-Site12-A4   | CAAGCCCTGTTGTCTCTTACC  |
| XVII-Gap 1-A1    | GGCACGAGTTATCCATTGCTG  |
| XVII-Gap 1-A4    | GCAAATGCACCAACAACACGG  |
| XIIIR-Gap 1-A1   | GCTAAAGTCCCATTGGTTGAC  |
| XIIIR-Gap 1-A4   | AGAAGTTCTCCTCGAGGATAG  |
| XIIIR-Site12-A1  | TAGAGTTGAGGGGATAGTGCC  |
| XIIIR-Site12-A4  | AACCACCATCCATCTCTCTAC  |
| YKU70-A1         | ACAACAGGTCACTTCTGCAAG  |
| YKU70-A4         | GGGACCCACAAAGTAATTGTC  |
| YKU80-A1         | GTAGCCTTGTGGCGCAATCG   |
| YKU80-A4         | CCTGTTTGTTCCTGGAAGTGC  |
| KanMX4-K2        | TTCAGAAACAACCTCTGGCGCA |
| KanMX4-K3        | CATCCTATGGAACTGCCTCGG  |

---

Each primer is named according to its target site. LEU2-M1 and LEU2-M2 were used for site directed mutagenesis of the *KIURA3-LEU2* cassette to generate the mutant heteroalleles *KIURA3-LEU2C* and *KIURA3-LEU2B*, respectively. All primers ending with F1 or R1 were used for generating cassettes by PCR, in order to carry out targeted gene disruptions or genomic integrations. The corresponding primers to determine genomic integration at the correct locus are shown immediately to the right. Primers ending with A1, were used in conjunction with U2 or K2 primers and primers ending with A4, were used in conjunction with U3 or K2 primers, respectively.

**TABLE S3**

Table S3 is available for download as a Microsoft Word file at  
<http://www.genetics.org/cgi/content/full/genetics.109.106674/DC1>.
