# Supplementary material for: InSaccharomyces cerevisiae, yKu and Subtelomeric Core X Sequences Repress Homologous Recombination Near Telomeres as Part of the Same Pathway
Source: Oxford University Press journal article supplement (doi:10.1534/genetics.109.106674), 2009-08-04
Supplement: figures1.pdf [file figures1.pdf]

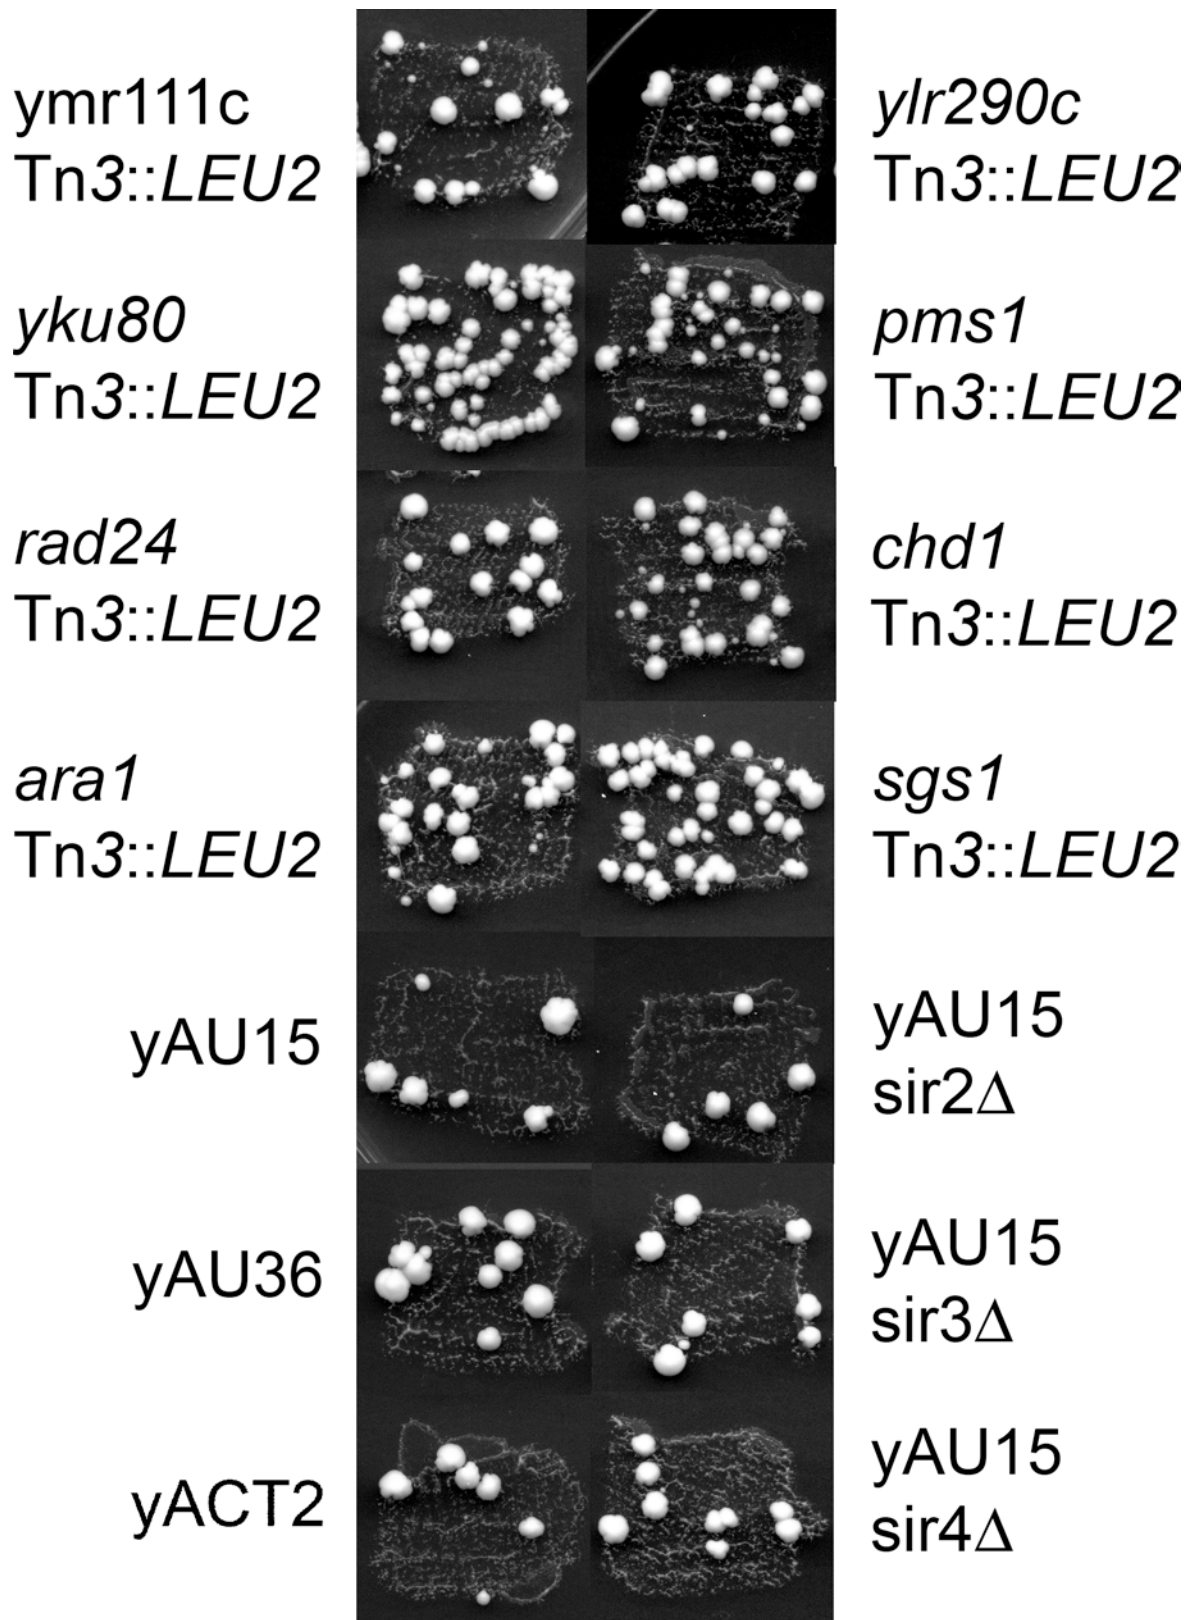

FIGURE S1.— Examples of some of the strains carrying transposon tagged alleles that confer elevated recombination in our genetic screen using strain *yAU15sir3*. It should be noted that strains carrying the *chd1*Tn3::*LEU2* allele only displayed elevated recombination when *SIR3* was also deleted in the genome, whereas the additional alleles shown above, displayed elevated recombination in all *yAU15* derived strains.
