# Supplementary material for: InSaccharomyces cerevisiae, yKu and Subtelomeric Core X Sequences Repress Homologous Recombination Near Telomeres as Part of the Same Pathway
Source: Oxford University Press journal article supplement (doi:10.1534/genetics.109.106674), 2009-08-04
Supplement: figures2.pdf [file figures2.pdf]

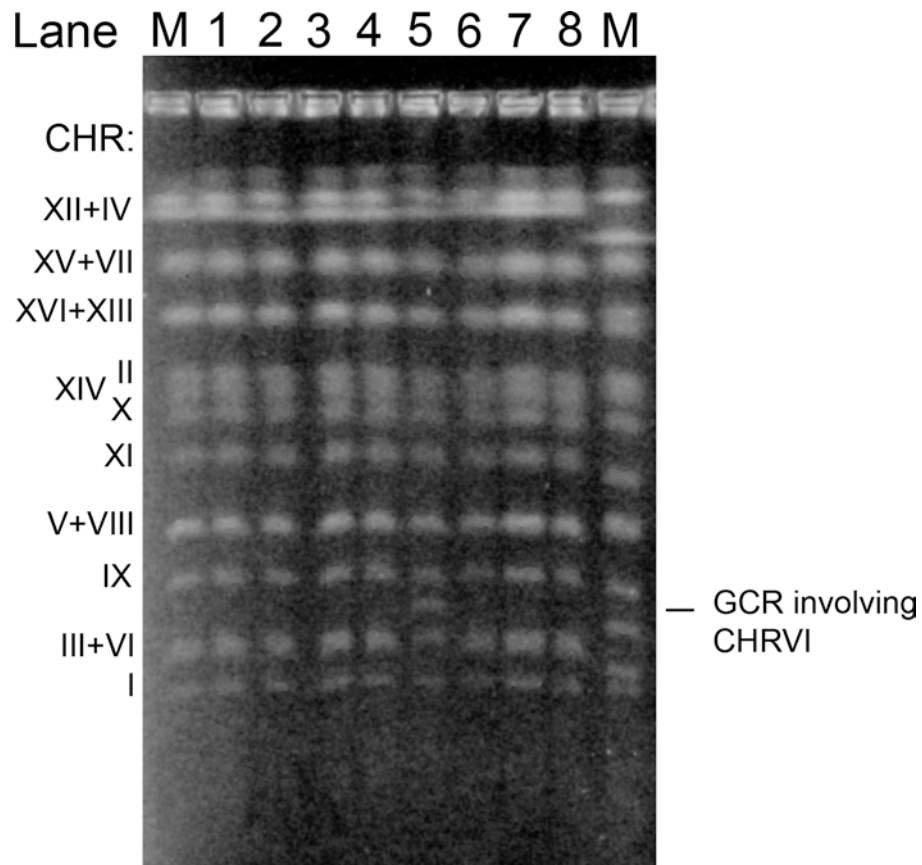

FIGURE S2.—Example of a strain from our genetic screen for hyper-recombination where a translocation involving chromosome VI had occurred. Markers (Lanes M) are the parental strain Y55 on the left hand side and S288C on the right hand side. A gross chromosomal rearrangement (GCR) involving chromosome VI can be observed in lane 5. Y55 chromosome positions on the gel are shown down the left hand side.
