# Supplementary material for: InSaccharomyces cerevisiae, yKu and Subtelomeric Core X Sequences Repress Homologous Recombination Near Telomeres as Part of the Same Pathway
Source: Oxford University Press journal article supplement (doi:10.1534/genetics.109.106674), 2009-08-04
Supplement: file_s1.xls [file file_s1.xls]

## Sheet: Hits with additional screens
FILE S1
	Red = Genes/proteins identified in the hyper-recombination screen (Marvin et al., 2009a). Hits with other screens that effect telomere maintenance.
	Blue = Genes/proteins with a physical or genetic interaction with genes from the hyper-recombination screen (Marvin et a., 2009a). Hits with other screens that effect telomere maintenance.
Gene/Protein	Hits with Shachar et al., (2008)	Hits with Gatbonton et al., (2006)	Hits with Addinall et al., (2008)	Hits with Askree et al., (2004)	Interactions within Marvin et al., (2009a) screen
YKU80		S	1c	1	1
STO1		L		1
HPR5	WT		1c		1
SGS1	WT				1
Vtc2p					1
Iwr1p					1
rad17			2ac		1
Rad24p			2ac		1
RPB2					1
RPB3					1
ULP2					1
Boi2p					1
Chd1p					1
Cos7p					1
Dhh1p					1
GDH3					1
HFI1		S			1
IDH1					1
MSB1					1
Phb1p					1
Phb2p			1a		1
RRM3					1
swr1					1
vtc3					1
AAP1
ABM1
APN1		L
ARA1
BCY1
BIO2
BPT1
CDC16
DSE2
EMP70
EPS1
EXG1
FLO9
FMP37
FMP43
GDE1
GPB1
HNT3
IRC7			1a
JJJ1
LCB4
MAF1
MAP2
MDL1
MUP1
NPY1
NUP53
PCL6	S
PMS1
PSD2
RDN18-1
RDN18-2
RDN25-1
RDN25-2
RDN37-1
RDN37-2
RDN5-1
RDN5-2
RDN58-1
RDN58-2
RNR3			1a
RPL18A
RPL9B
RSN1
RTT105
SAG1
SAH1
SAS10
SEN54
SKN7
SNG1
SNO2
SNT1
SPE1
SPO77
SPS22
TCO89
TEA1
TIP20
TPO2
TRM3
TYS1
UFD2			1a
UIP5
YAL049C
YAP1802
YBR242W
YCL049C
YDC1
YEA4
YFR056C
YGR039W
YHR048W
YJR061W
YKL007W
YKR045C
YLR164W
YLR290C
YMR111C
YNL155W
YNL321W
YNR063W
YTA6
Mre11p				1
Pho85p				1
pif1		L	1a	1
est2		S	1c	1
Hpr1p				1
Rpb4p		S		1
Yku70p		S	1c	1
elg1		L	1c	1
Mlh1p				1
Pol32p		L		1
rad50		S		1
Rpb9p				1
Srb2p		S		1
Srb5p		S		1
cdc73		S	1c	1
dcc1		S	1a	1
dep1				1
mmm1				1
Pho80p				1
rpn4				1
Rtf1p		S		1
Sml1p	WT			1
Tel1p		S		1
Asc1p			2ac	1
bem2				1
bem4				1
Cdh1p				1
est1		S	1c	1
gpb2				1
gup1			1a	1
hsc82				1
Hst1p				1
Kem1p		S		1
npl6		L		1
Nut1p				1
Pmt3p				1
Rpl13bp		S		1
sit4				1
soh1				1
sse1				1
sum1		S		1
Vps75p				1
Xrs2p		S		1
Yta7p				1
Yck1p
Hsp82p
Rad53p
Atg1p
Cdc28p
Ksp1p
Rad51p
rad52			1c
Rad9p			2ac
get1			1a
get2
Kap95p
Mec3p
Ser3p
Set2p
Srp1p
Sua7p
Yck2p
Bim1p			1c
ccr4
ctf18
ctf4			1c
Ddc1p			2ac
Dun1p		S
Npl3p
pac1
Pol30p	L
Pop2p
Pre1p
Ptk2p
rad1
Rad59p
Rfc1p
Rpo21p
scs7
Sec27p
Sen1p
Sgv1p
Smt3p
Spt5p
ssd1
Taf9p
Tpk1p
ypt6			1a
Yra1p
ard1		L
asf1
Asr1p
Atp14p
Cbc2p		L
Cbf5p
Cdc2p
Cdc33p	WT
Cdc42p
Cdc48p	WT
Clb2p			1c
Clb5p
ctf8		S
Dbf2p
Def1p
Did4p
Dnl4p
dpb11
Ess1p
Fus3p			1a
Gcn5p
Hhf1p
Hta1p
Ime2p
Ire1p
Jsn1p
kar9
Kin82p
Lys14p
mad2
mms4
Mph1p			1a
msh2	WT
Mud1p
Nrd1p
Nup116p
Pds1p
Pil1p
pma1
Pob3p
Por1p
psd1
Pse1p
rad54
rad6		S
ras2
Rck1p
Rlf2p
Rpb10p
Rpb11p
Rpb5p
Rpb7p
Rpb8p
Rpo26p
Rpo31p
Rrp5p
Rvs167p
Sec22p
Skm1p
Sks1p
Spt16p
Spt3p
Srb4p
Taf10p
Top2p
tor1	WT
Tpk3p
Vid22p
yke2
Ykl171wp
Yta12p
Act1p
Ada2p
Adh1p
Afg3p
Anp1p
Ark1p
Arp1p
Arp6p
Bck1p
Bdf1p
Bem1p
Bzz1p
Cap2p			1a
Cct3p
Cdc20p
Cdc24p
Cdc26p
Cdc39p
cep3
cin8
Cka1p			1a
Cla4p
Cpr1p
Crm1p
Cse2p
Cyc1p
cyr1
Cys4p
Ded1p
dia2
Dpb2p
Dsl1p
Dst1p
elm1			2ac
Elp2p
Erb1p
exo1			2ac
Fks1p
gcr1
Gfa1p
Gic2p
gim5
gmh1
Gpa2p
Gtt1p
Hap2p			1a
Hex3p
him1
Hsp42p
Htz1p			1a
ice2
Ifa38p
Iks1p
ilm1			1a
Isw1p
Isw2p
Jhd2p
jnm1			1c
Kss1p
Lsm2p
Lsm8p
Lsp1p
Luc7p
Mad1p
Mck1p			1a
mdm10		L
mdm12
Med2p
Med4p
Med6p
Mkk2p
Mlp2p
Mms1p			1c
Mnn11p			1c
Mnn9p
mrc1		S	1c
Msh6p
mss4
Mud2p
Mus81p
Nam8p
nat1
nbp2
Ndj1p
Net1p
Nfi1p,
Ngg1p
nip100
Nog2p
Nop1p
Nop58p
Npa3p
Npl4p
Ntg1p
Orc6p
pac10			1a
Pcl9p
pde2
Pdr11p
Pho86p			1a
Pmr1p
Prp45p
Prp4p
Prr2p
Puf3p
Rad10p
Rad14p			1c
Rad16p
Rad18p
rad27		L	1c
Rad2p
rad30
rad4			1c
rad55
Rad5p		L
Rck2p
Ret1p
rev3
Rfc3p
Rfc5p
rgp1
Rgr1p
ric1			1a
Rim1p			1a
Rna15p
Rnr1p		S
Rpc10p	S
Rpc40p
Rpn12p
Rpn1p
Rps4ap		L
Rsc1p
Rsp5p
Rtt107p
Rvb1p
Sac6p
Sec20p
Sec39p
Sec7p
Sen15p
Sgf29p
Sho1p			1c
Shp1p		S
Sif2p	S
Sin4p
Sip1p
Smd3p
snf2
Snp1p
Snu56p
Snu71p
Sps1p
Spt15p
Spt20p
Spt4p
Spt7p
Spt8p
Ssu72p
ste12
Ste20p
Sti1p			1c
sur2
Swc3p
Swc5p			1a
Swe1p
swi1
Taf12p
Taf14p
Taf5p
Taf6p
tdp1
Tem1p
Tfa1p
Tfg1p
Tfg2p
Tif4631p
Tna1p			1a
tom1
Top3p
Tpk2p
Tra1p
Tsa2p
Ubp8p
Ufe1p
Ura2p
Vps71p
Vps72p
Vtc1p
wss1
Yaf9p
Ydr128wp
Ydr307wp
Yer071cp
Yer139cp
Ypl141cp
Ypl264cp
Ypt53p
Zds1p
Abd1p
Abf2p
Acc1p
Adr1p
agp1
Aha1p
aip1
Air2p
Akl1p
Akr2p
Alk1p
alr1
Aly2p
Ama1p
amn1
Apc11p
Apc1p
Apc2p
Apc4p
Apc5p
Apc9p
Apl4p
apn2
App1p
Apt1p
aqy2
Arc1p
arl3
Aro1p
Arp2p
Arp4p
arp8
Arx1p			1a
Asg7p
ask1
Asm4p
atm1
Atp3p
Avo1p
Bap3p
bbc1
Bch2p
bfr1
Bmh1p			1a
Bmh2p
Bni1p
Bns1p
boi1
bph1
bre1		S
bre5
Brf1p
Brr1p
Brr2p
Bsd2p
Bsp1p
Bst1p			1a
Bud27p			1a
Bur2p
caf20
Cam1p
Cbf2p
Cce1p
ccs1			1c
Cct5p
cdc13
cdc15
Cdc23p
Cdc27p
Cdc31p
cdc4
Cdc40p
Cdc46p
Cdc5p
cdc6
Cdc60p
Cdc7p
cdc9
Chc1p
chk1			2ac
Cho1p
Chs1p
Chs2p
Cka2p			1a
Ckb1p
Ckb2p			1a
Cks1p
Clc1p
Cln2p
cln3
Clu1p
Cmd1p
Cmk1p
Cmp2p
cof1
Cog4p
Cop1p
coq3
Cox15p
Cox2p
Cpa2p			1a
Cpt1p
Crn1p
Crz1p
csm3
ctr2
Cus1p
Cwc2p
Cyc8p
dam1
dbp5
Dcp1p
Ddi1p
Ded81p
Deg1p			1a
Dfr1p
Dig2p
Dma2p
dmc1
dna2
doa4		S
Doc1p
dot1			1c
dpl1
Dpp1p
Dps1p
Dse1p
Dse3p
Dsk2p
Dss1p
Dug2p
Dus3p
dut1
dyn1
eaf3
Ecm10p
Ecm29p
Eco1p
Edc3p
Ede1p			1a
Eft1p
Egt2p
Elc1p
Emi2p
Emp24p
Ena1p
End3p
Erd1p
Erg24p
Erg6p			1a
Erg9p
Erp1p
Erp2p
Erp4p
Esbp6p
Esc1p
Esf2p
eug1
Faf1p
Far1p
Far8p
Fas1p
Fat1p
Fet5p
Fir1p
Flc2p
flo8
flr1
Fmp40p
Fmp48p
Fol2p
Frs2p
Frt2p
Fun12p
Fzo1p	L
gal11		S
Gal7p
gas1			2ac
Gat2p
Gcn20p
Gcn3p,
Gcs1p
gdh1
Gds1p
Gea2p
gic1
gim3
gim4
Gis1p
Glc7p
glc8
Gle1p
gln3
gos1			1a
Gpg1p
Gph1p
gpi13
Gpi2p
Gre2p
gre3
Grr1p
Gsf2p
Gsp2p
Gtb1p
Gts1p
Gud1p
Gus1p
gwt1
hac1
Heh2p
Hek2p
Hem14p
Hhf2p
hho1
His4p
Hmf1p
hmt1
hog1
hom3			1c
Hos2p
Hos4p
Hrb1p
Hrk1p
Hrr25p
Hrt1p
Hrt3p
hsf1
Hsh49p
hsm3
Hsp150p
Hsp30p
Htb1p
Htl1p		L
Idh2p
idp1
idp2
Ies2p
Ifh1p
ifm1
Igo1p
Iki3p
Ilv1p
Ilv2p
Imd3p
ime1
Ime4p
Inp54p
Ira1p
Ira2p
Isc1p
Ist3p
itc1
izh3
Kap114p
Kap120p
Kap122p			1a
Kap123p
kar2
Kcc4p
Kin28p
Kin3p			1a
Kin4p
Kkq8p
knh1
Kns1p
kre27
kre6
Ktr2p
lac1			1a
lag1
lcb3			1a
lcb5
Lip1p
Lsc1p
Lsm12p
Lsm1p
Lsm3p
Lsm4p
Lsm5p
Lsm6p
Lsm7p		L
lst4			1a
Lst8p
Lte1p			1c
Lys12p
Mae1p			1c
mak16
Mak21p	S
map1
Mas1p
Mas2p
matalpha2
mcd1
mcm16
Mdh2p
Mdy2p
mec1
Med7p
Med8p
Mei5p
Mek1p
Met16p
Met18p
mgs1
Mis1p
Mkt1p
Mlc1p
Mlh2p			1a
Mlh3p
mlp1
Mmr1p
mms21
Mmt1p
Mnd2p
mnl1
Mns1p
Mon1p
mot1
mot2
Mpp10p
mps1
Mrm1p
Mrp4p
Mrp8p
Mrps16p
Mrps18p
Mrps5p
Mrps8p
Mrs6p
msh3
Msh4p
Msh5p
msi1
Msl1p
Mss51p
Mtr10p
Mtr4p
muc1
Mvd1p
Nab3p
Nap1p
Ndc1p
Nhp6bp
Nic96p
nip7
Nis1p
Nkp1p
Nmd5p
Nog1p
Nop4p
not3
not5
Npr1p			1a
Nsa1p
Nsa2p
Nsg1p
ntg2
Nug1p
num1
Nup120p
Nup145p
Nup157p
nup159
Nup170p
Nup192p
Nup1p
Nup42p
Oaf3p
opi3
orc2
Otu1p
Oye2p
Pab1p
pac11
Pan1p
Pat1p			1c
Pbp1p
Pbs2p
Pcl1p
pct1			1a
pdi1
Pdr17p
Pdr3p
Pdx1p			1c
Pep12p
Pep3p
Pex2p
Pex30p
pex4			1a
pex5
Pga3p
Pgd1p
Pho11p
Pho4p
Pho88p		S
Pib1p
Pir1p	L
pkc1
Plp2p
Pmp2p
pmt4
pmt6
pol1
pol2
Pom152p
Pph3p
Ppz1p
pre9			1c
Prk1p
Prp11p
Prp19p
Prp40p
Prp42p
Prp43p
Prp6p
Prp8p
Prt1p
pry1
Psa1p
Psk1p
Pst2p
Psy4p
ptc2
Ptc6p
Pub1p	L
Pup2p
Pup3p
Pwp1p
Pxr1p
Pyc2p
Qri8p
Rad23p
rad3	WT
Rad57p
Rai1p
Rap1p
ras1
ret2
Rev7p
Rfc2p
Rfc4p
rho3
rho4			1a
rim15
Rlr1p
Rmi1p
Rnq1p
rnr4
Rpc19p
Rpc31p
Rpc34p
Rpc37p
Rpc82p
Rpd3p
Rpf2p
Rpl10p
Rpl20ap
Rpl27ap
Rpl2ap			1a
Rpl3p
Rpl40ap
Rpl4ap			1a
Rpl4bp
Rpl5p
Rpl7ap
Rpn9p
Rpp0p
Rpp1bp
Rps1bp
Rps22ap		L
Rps3p
Rps6ap
Rpt1p
Rpt3p
rrn10
Rrp3p
Rrp9p
Rsc4p
Rse1p
Rsm10p
Rtg2p
Rtt103p			1c
rtt106
Rvb2p
rvs161			1c
Sae2p
Sae3p
Sam1p			1a
San1p
Sap1p
Sba1p
Sbp1p
Scp160p
sec15
sec18
sec21
Sec23p
sec28
Sec31p
Sec53p
Sen2p
seo1
set1
Set3p
Sft2p
Sgf11p
Sgf73p
Shu2p
Sia1p
Sir3p
Sir4p		S
Sis1p
Sis2p
Siz1p
Ski8p			1a
sla2		S
Slc1p
Slt2p	WT
Slx1p
sly1
Smb1p
Smc2p
Smc5p
Smd1p
Smd2p
Smx2p
Smx3p
Snc2p		S
Snf1p
snf5
sno1
sno3
Snu13p
Snz2p
Snz3p
Sod2p
Spc34p
spe2
spe4
Spn1p
spo13
Spo74p
Spt2p			1a
spt6
Sqt1p
srm1
Sro77p
Sro9p
srv2
Ssa1p
Ssa2p
Ssb2p
Ssc1p
ssh1		L	1a
Ssk1p
Ssu1p
ssy1
Stb5p			1a
stm1			1a
Sup45p
Sus1p
Swa2p		S	1a
Swc4p
Swc7p
Swd3p			1c
Swi5p
Swm1p			1c
Sys1p
Taf8p
Tar1p
Tcp1p
Tdh2p
tec1
Tep1p
Tfb5p
Tfc7p
Thg1p
Thi71p
Ths1p
Tif2p	L		1a
Tif4632p
Tif5p
Tif6p
Tlg2p			1c
Tma16p
Tma29p
Toa1p
Tos3p
tpp1
Tps1p
Trs20p
Trs31p
Trx2p
tsa1
Tsc13p
Tsl1p
Tub2p
Tub3p
Tuf1p
Tvp15p
Twf1p
ubc6
Ubc9p
Ubi4p
Ubp10p
Ubp1p
Ubp6p			1a
Ubr1p
Ubx3p
Ufd1p
Ufo1p
Ugp1p
Uip3p
Ume6p
Ura7p
Urb2p
Use1p
Vba2p
Vhs1p
Vid24p
Vma22p
Vma8p
Vps1p			1a
Vps68p
Vps73p
Whi4p
Yap1p
Yar028wp
Ybl036cp
Ybr042cp
Ybr141cp
Ybt1p
ycf1
Ycr007cp
Ycr061wp
Ydl025cp
Ydl211cp
Ydr049wp
Ydr306cp
Yef3p
Yel023cp
Yel048cp
Yer077cp
Yer140wp
Yer156cp
Yfl034wp
Yfl040wp
Yfr016cp
Ygk3p
Ygl101wp
Ygl185cp
Ygl250wp
Ygr054wp
Ygr266wp
Yhc1p
Yhr033wp
Yhr159wp
Yhr182wp
Yhr202wp
yil039w
Yil091cp
Yil161wp
Yip1p
Yip4p
Yir003wp
Yir007wp
Yju2p
Ykl077wp
Ykl161cp
Ykr051wp
Yll023cp
Yll029wp
Ylr271wp
Ylr413wp
Yml020wp
Ynl092wp
Ynl134cp
Ynl234wp
Ynl247wp
Ypd1p
Ypl150wp
Ypl162cp
Ypl216wp
Ypl236cp
Ypr003cp
Yra2p
Ytm1p
Zds2p
	L = Long telomeres	L = Long telomeres	a = Genes whose deletion rescues temperature sensitivity of cdc13-1
	S = Short telomeres	S = Short telomeres	b = Genes whose deletion rescues the growth defect of cdc13-1 cells
	WT = Normal length telomeres		c = Genes whose deletion imparts a phenotype in the cdc13-1 UP-DOWN assay
