# Supplementary material for: InSaccharomyces cerevisiae, yKu and Subtelomeric Core X Sequences Repress Homologous Recombination Near Telomeres as Part of the Same Pathway
Source: Oxford University Press journal article supplement (doi:10.1534/genetics.109.106674), 2009-08-04
Supplement: tables1.pdf [file tables1.pdf]

**TABLE S1****Strains and genetic crosses used in this study**

| <sup>1</sup> Haploids (parental) | <sup>2</sup> Genotype                                                         |
|----------------------------------|-------------------------------------------------------------------------------|
| ND9                              | <i>MATa; ura3-52; ade2-101; leu2Δ; TRP1; his4-r; can1-R; CYH2-s; lys2-801</i> |
| ND44                             | <i>MATα; ura3-52; ade2-101; leu2Δ; trp1-h; HIS4; CAN1-s; cyh2-R; lys2-r2</i>  |
| Diploids (crosses)               |                                                                               |
| PCF254 × PCF257                  | XVR Gap 1<(KIURA3::leu2-C) XVR Gap 1<(KIURA3::leu2-B)                         |
| PCF400 × PCF477                  | XVR Gap 3<(KIURA3::leu2-C) XVR Gap 3<(KIURA3::leu2-B)                         |
| PCF406 × PCF480                  | XVR Gap 4<(KIURA3::leu2-C) XVR Gap 4<(KIURA3::leu2-B)                         |
| PCF491 × PCF490                  | XVR Gap 6<(KIURA3::leu2-C) XVR Gap 6<(KIURA3::leu2-B)                         |
| PCF414 × PCF495                  | XVR Gap 7<(KIURA3::leu2-C) XVR Gap 7<(KIURA3::leu2-B)                         |
| PCF417 × PCF499                  | XVR Gap 8<(KIURA3::leu2-C) XVR Gap 8<(KIURA3::leu2-B)                         |
| PCF263 × PCF269                  | XVR Gap 9<(KIURA3::leu2-C) XVR Gap 9<(KIURA3::leu2-B)                         |
| PCF876 × PCF509                  | XVR Site 11<(KIURA3::leu2-C) XVR Site 11<(KIURA3::leu2-B)                     |
| PCF265 × PCF266                  | XVR Site 12<(KIURA3::leu2-C) XVR Site 12<(KIURA3::leu2-B)                     |
| PCF1126 × PCF1120                | XVR Site 11<(KIURA3::leu2-C) XVR Gap 1<(KIURA3::leu2-B)                       |
| PCF1146 × PCF1129                | XVR Site 12<(KIURA3::leu2-C) XVR Gap 1<(KIURA3::leu2-B)                       |
| PCF432 × PCF507                  | XVIL Gap 1<(KIURA3::leu2-C) XVR Gap 1<(KIURA3::leu2-B)                        |
| PCF984 × PCF1022                 | XVIL Site 11<(KIURA3::leu2-C) XVR Site 11<(KIURA3::leu2-B)                    |
| PCF327 × PCF334                  | XVIL Site 12<(KIURA3::leu2-C) XVIL Site 12<(KIURA3::leu2-B)                   |
| PCF437 × PCF504                  | XIIIR Gap 1<(KIURA3::leu2-C) XIIIR Gap 1<(KIURA3::leu2-B)                     |
| PCF524 × PCF1084                 | XIIIR Site 12<(KIURA3::leu2-C) XIIIR Site 12<(KIURA3::leu2-B)                 |
| PCF955 × PCF1013                 | XIIIR Site 12<(KIURA3::leu2-C) XIIIR Site 12<(KIURA3::leu2-B)                 |
| PCF941 × PCF1041                 | XIIIR Site 12<(KIURA3::leu2-C) XIIIR Site 12<(KIURA3::leu2-B)                 |
| PCF367 × PCF359                  | VIIR Site 12<(KIURA3::leu2-C) VIIR Site 12<(KIURA3::leu2-B)                   |
| PCF226 × PCF220                  | XIIIL Site 12<(KIURA3::leu2-C) XIIIL Site 12<(KIURA3::leu2-B)                 |
| PCF382 × PCF373                  | XVIR Site 12<(KIURA3::leu2-C) XVIR Site 12<(KIURA3::leu2-B)                   |

|                   |                                                                                                                                         |
|-------------------|-----------------------------------------------------------------------------------------------------------------------------------------|
| PCF950 × PCF1009  | VR Site 11<(KIURA3::leu2-C) VR Site 11<(KIURA3::leu2-B)                                                                                 |
| PCF1081 × PCF1082 | VR Site 12<(KIURA3::leu2-C) VR Site 12<(KIURA3::leu2-B)                                                                                 |
| PCF1136 × PCF1111 | XVR Gap 1<(KIURA3::leu2-C) XVR Gap 1<(KIURA3::leu2-B) yku70Δ::NatMX4/yku70Δ::NatMX4                                                     |
| PCF1101 × PCF1117 | XVR Site 12<(KIURA3::leu2-C) XVR Site 12<(KIURA3::leu2-B) yku70Δ::NatMX4/yku70Δ::NatMX4                                                 |
| PCF1105 × PCF1138 | XVIL Gap 1<(KIURA3::leu2-C) XVIL Gap 1<(KIURA3::leu2-B) yku70Δ::NatMX4/yku70Δ::NatMX4                                                   |
| PCF1114 × PCF1103 | XVIL Site 12<(KIURA3::leu2-C) XVIL Site 12<(KIURA3::leu2-B) yku70Δ::NatMX4/yku70Δ::NatMX4                                               |
| PCF1105 × PCF1111 | XVIL Gap 1<(KIURA3::leu2-C) XVR Gap 1<(KIURA3::leu2-B) yku70Δ::NatMX4/yku70Δ::NatMX4                                                    |
| PCF1136 × PCF1138 | XVR Gap 1<(KIURA3::leu2-C) XVIL Gap 1<(KIURA3::leu2-B) yku70Δ::NatMX4/yku70Δ::NatMX4                                                    |
| PCF1105 × PCF1117 | XVIL Gap 1<(KIURA3::leu2-C) XVR Site 12<(KIURA3::leu2-B) yku70Δ::NatMX4/yku70Δ::NatMX4                                                  |
| PCF1101 × PCF1138 | XVR Site 12<(KIURA3::leu2-C) XVIL Gap 1<(KIURA3::leu2-B) yku70Δ::NatMX4/yku70Δ::NatMX4                                                  |
| PCF1114 × PCF1111 | XVIL Site 12<(KIURA3::leu2-C) XVR Gap 1<(KIURA3::leu2-B) yku70Δ::NatMX4/yku70Δ::NatMX4                                                  |
| PCF1136 × PCF1103 | XVR Gap 1<(KIURA3::leu2-C) XVIL Site 12<(KIURA3::leu2-B) yku70Δ::NatMX4/yku70Δ::NatMX4                                                  |
| PCF1114 × PCF1117 | XVIL Gap 1<(KIURA3::leu2-C) XVR Site 12<(KIURA3::leu2-B) yku70Δ::NatMX4/yku70Δ::NatMX4                                                  |
| PCF1101 × PCF1103 | XVR Site 12<(KIURA3::leu2-C) XVIL Site 12<(KIURA3::leu2-B) yku70Δ::NatMX4/yku70Δ::NatMX4                                                |
| PCF1101 × PCF1111 | XVR Site 12<(KIURA3::leu2-C) XVR Gap 1<(KIURA3::leu2-B) yku70Δ::NatMX4/yku70Δ::NatMX4                                                   |
| PCF1136 × PCF1117 | XVR Gap 1<(KIURA3::leu2-C) XVR Site 12<(KIURA3::leu2-B) yku70Δ::NatMX4/yku70Δ::NatMX4                                                   |
| PCF1114 × PCF1138 | XVIL Gap 1<(KIURA3::leu2-C) XVIL Gap 1<(KIURA3::leu2-B) yku70Δ::NatMX4/yku70Δ::NatMX4                                                   |
| PCF1105 × PCF1103 | XVIL Gap 1<(KIURA3::leu2-C) XVIL Site 12<(KIURA3::leu2-B) yku70Δ::NatMX4/yku70Δ::NatMX4                                                 |
| PCF1146 × PCF1129 | XVR Site 12<(KIURA3::leu2-C; core X-y'acsΔ:: KanMX4) XVR Site 12<(KIURA3::leu2-B; core X-y'acsΔ:: KanMX4)                               |
| PCF1146 × PCF1129 | XVR Site 12<(KIURA3::leu2-C; core X-y'acsΔ:: KanMX4) XVR Site 12<(KIURA3::leu2-B; core X-y'acsΔ:: KanMX4) yku80Δ::NatMX4/yku80Δ::NatMX4 |
| PCF1131 × PCF1153 | XVR Site 12<(KIURA3::leu2-C; Gap 8-y'acsΔ:: KanMX4) XVR Site 12<(KIURA3::leu2-B; Gap 8-y'acsΔ:: KanMX4)                                 |
| PCF1131 × PCF1153 | XVR Site 12<(KIURA3::leu2-C; Gap 8-y'acsΔ:: KanMX4) XVR Site 12<(KIURA3::leu2-B; Gap 8-y'acsΔ:: KanMX4) yku80Δ::NatMX4/yku80Δ::NatMX4   |
| PCF1135 × PCF1119 | XVR Site 12<(KIURA3::leu2-C) XVR Site 12<(KIURA3::leu2-B)                                                                               |
| PCF524 × PCF490   | XIIIR Site 12<(KIURA3::leu2-C) XVR Gap 6<(KIURA3::leu2-C)                                                                               |
| PCF524 × PCF490   | XIIIR Site 12<(KIURA3::leu2-C) XVR Gap 6<(KIURA3::leu2-B) yku80Δ::KanMX6/yku80Δ::KanMX6                                                 |
| PCF491 × PCF490   | XVR Gap 6<(KIURA3::leu2-C) XVR Gap 6<(KIURA3::leu2-B)                                                                                   |
| PCF491 × PCF490   | XVR Gap 6<(KIURA3::leu2-C) XVR Gap 6<(KIURA3::leu2-B) yku80Δ::KanMX6/yku80Δ::KanMX6                                                     |

|                 |                                                                                          |
|-----------------|------------------------------------------------------------------------------------------|
| PCF876 × PCF509 | XVR Site 11<(KIURA3::leu2-C) XVR Site 11<(KIURA3::leu2-B)                                |
| PCF876 × PCF509 | XVR Site 11<(KIURA3::leu2-C) XVR Site 11<(KIURA3::leu2-B) yku80Δ::KanMX6/yku80Δ::KanMX6  |
| PCF524 × PCF507 | XIIIIR Site 12<(KIURA3::leu2-C) XVR Gap 1<(KIURA3::leu2-B)                               |
| PCF524 × PCF507 | XIIIIR Site 12<(KIURA3::leu2-C) XVR Gap 1<(KIURA3::leu2-B) yku80Δ::KanMX6/yku80Δ::KanMX6 |

---

<sup>1</sup>ND9 and ND44 are the two parental strains that were used for *leu2-C* or *leu2-B* insertions. Following successful insertion of each heteroallele the parental strains were crossed to generate the diploids for analysis of recombination rates. <sup>2</sup>All diploid genotypes are therefore ND9×ND44 and denote insert sites for the *leu2* heteroalleles (see Figure 1A).
