# Supplementary material for: InSaccharomyces cerevisiae, yKu and Subtelomeric Core X Sequences Repress Homologous Recombination Near Telomeres as Part of the Same Pathway
Source: Oxford University Press journal article supplement (doi:10.1534/genetics.109.106674), 2009-08-04
Supplement: tables2.pdf [file tables2.pdf]

**TABLE S2****Primers used in this study**

| Primer            | Sequence (5'→3')                                                   |
|-------------------|--------------------------------------------------------------------|
| LEU2-M1           | CCTAGTTAAGAACCCAACCCAggCCTAAATGGTATTATAATCACCAGC                   |
| LEU2-M2           | GCTGGTGATTATAATACCATTTAGGccTGGGTTGGGTTCTTAAGT                      |
| XVR-GAP 1-F1      | TCAATTAAGGTTCTTGGTAATTTCTATTTCTGAAAAACAAAAACattctgggtagaagatcg     |
| XVR-GAP 1-R1      | TATGATTTTGGTAATTTGAGTCAAATAGTCAATCAATGACTTTTTTgggaataactcaggtatcg  |
| XVR-GAP 2-F1      | AAAGAAAAATAAATTTAATGTATGTATCTATATATATATATATattctgggtagaagatcg      |
| XVR-GAP 2-R1      | TAATAATAACCCAGTTGATTATGGCTATTGTCTGTTTTAAGTGATgggaataactcaggtatcg   |
| XVR-GAP 3-F1      | GATCTTGACATAAATGGCCTATTATAGAGAGTCACGCTGAACACattctgggtagaagatcg     |
| XVR-GAP 3-R1      | AGCTCTAGCAACTTAATGCAGAGAAAGATTTGAAGCTACCGCCGcgggaataactcaggtatcg   |
| XVR-GAP 4-F1      | AATTAATGATACTTATAATAAATTTGATTGAAAATAGTTACCTATTattctgggtagaagatcg   |
| XVR-GAP 4-R1      | TTCATATATATTAAGGAGTTTAACTATATACATATGATTAGGTAgggaataactcaggtatcg    |
| XVR-GAP 5-F1      | TGCAGCAAACAAAAGGGCGAAATAATAGTTACTCCAAAGATGAAattctgggtagaagatcg     |
| XVR-GAP 5-R1      | ATGCCTCCTTCGCAAACGTATAGTTTTCCATTTTCTTCTGCCATgggaataactcaggtatcg    |
| XVR-GAP 6-F1      | TCTTCGCCAACTCTATAAAAAGGCTGTACTCCTATAATTAAGTATgggaataactcaggtatcg   |
| XVR-GAP 6-R1      | CACAACTCATAGAAAATAAATACTAGTATGATTCCGGAAATTAATTTattctgggtagaagatcg  |
| XVR-GAP 7-F1      | AAATGTTCTAGCTATTCATTTACCTTCCCGAAAAGCATTCTTTCGAattctgggtagaagatcg   |
| XVR-GAP 7-R1      | GCAACGAAGACAGTTCTGAGATGAATGGCAGAAAGAACTGCAGCTgggaataactcaggtatcg   |
| XVR-GAP 8-F1      | TTATCCAAACCGTTGGAGCTTTCCCTTTATTTCTACATAGGTTTCattctgggtagaagatcg    |
| XVR-GAP 8-R1      | AAACAGATCGCCATAAAAAGGAGAAGCTCCGTAGGAGACCGTTTTTCgggaataactcaggtatcg |
| XVR-GAP 9-F1      | TTTTTTCAACTACTGTTACGGTCAAGAACTAATACTGAGGATAAattctgggtagaagatcg     |
| XVR-GAP 9-R1      | TTCAAGACTTTAAATCACTTGTACCAAAATCATTGTTGCGAAAACgggaataactcaggtatcg   |
| XVR-Site11-F1     | ACGTAGATGAGCTATCGATTTTTTCTGCATACCAAGCAAGTTTACattctgggtagaagatcg    |
| XVR-Site11-R1     | ATAGATCACGCTTCAGCCGCTCTGTGTCGACTTTCTTTTCGCCAGgggaataactcaggtatcg   |
| XVR-Site12-F1     | GTATTTCACTGTTTTGATTTAGTGTGTTGTCACGGCAGTAGCGAattctgggtagaagatcg     |
| XVR-Site12-R1     | CTTTTTATAGATTGTCTTTTTATCCTACTCTTTCCACTTGTCTCgggaataactcaggtatcg    |
| XVIL-Gap 1-F1     | GATGTGGTAAAGACAACGAAATACTACGTAAATCATATTGGTCTGattctgggtagaagatcg    |
| XVIL-Gap 1-R1     | ATTCCATTGCAGTGATTTGATTGGGAGTAAGCTTTTATAAACGAGgggaataactcaggtatcg   |
| XIIIIR-Gap 1-F1   | CATAGCTAAAGGACTATCTGGCTCGGCCATAAGTTTGAATTTGTattctgggtagaagatcg     |
| XIIIIR-Gap 1-R1   | CTTCGACGATTTAGGTAGGTATAAGGGTTTCCCTATACCTGTATAgggaataactcaggtatcg   |
| XIIIIR-Site12-F1  | ATTGGAGGGTAACGGTTATGGTGCACGATGGGTGGTGGTAGCAAattctgggtagaagatcg     |
| XIIIIR-Site12-R1  | TGTCCTTTCAACCATAACCGCTCCAACCACCATCCATCTCTCTACgggaataactcaggtatcg   |
| YKU70Δ::KanMX4-F1 | ATGATTTGTTAAGTGACTCTAAGCCTGATTTTAAAACGGGAATATTcgtacgctgcaggtcgac   |
| YKU70Δ::KanMX4-R1 | AAATATTGTATGTAACGTTATAGATATGAAGGATTTCAATCGTCTatcgtatgaattcaggtcgac |
| YKU80Δ::KanMX4-F1 | AGAGTGCAGGACATATGCACAAATAATATATCTCACACCATAATAcgtacgctgcaggtcgac    |
| YKU80Δ::KanMX4-R1 | TAACTGTGGTGACGAAAACATAACTCAAAGGATGTTAGACCTTTTatcgtatgaattcaggtcgac |
| KIURA3B/C-U2      | CCTGGCAAACGACGATCTTC                                               |
| KIURA3B/C-U3      | CAATGGAACGACAGTACCCTC                                              |
| XVR-GAP 1-A1      | GCCGTATGTTATGGGTGCAAG                                              |
| XVR-GAP 1-A4      | GCTTGCTGACACAGAAGTGAC                                              |
| XVR-GAP 2-A1      | GCATCCTAATGCTGGTCCTAC                                              |
| XVR-GAP 2-A4      | GCTGCAGACATCTCTAATGTG                                              |
| XVR-GAP 3-A1      | CGTGATTTAGCTATCGGAACC                                              |

|                  |                        |
|------------------|------------------------|
| XVR-GAP 3-A4     | CTAATACGGTAGAGTGTGCGAC |
| XVR-GAP 4-A1     | CACTTCCTTGCCTAAAAGCTGG |
| XVR-GAP 4-A4     | CCAGGATACATCATCGTCATC  |
| XVR-GAP 5-A1     | CGTTCCCTCTAGACATCTACAG |
| XVR-GAP 5-A4     | ACGGTTGGTTCGTTAACACCTC |
| XVR-GAP 6-A1     | CATACCCTTGGTTGGTACGAC  |
| XVR-GAP 6-A4     | CCGTTTCGCAGTGTAAACTATG |
| XVR-GAP 7-A1     | CGAAGGTACTACACCTCACCC  |
| XVR-GAP 7-A4     | GGCTTACGAATGAACATGAGC  |
| XVR-GAP 8-A1     | TGTCTTTTAAGAGTGAAGAGCC |
| XVR-GAP 8-A4     | GACAGTGCAGAGTGATTTCTC  |
| XVR-GAP 9-A1     | GGGAAGGCTGTTCCAATCAAG  |
| XVR-GAP 9-A4     | CGTATTGCTAAGCCTATCTCC  |
| XVR-Site11-A1    | CAGAACTGGTGCAATGGATAG  |
| XVR-Site11-A4    | AACTGAGCCTTGCATGCAAAG  |
| XVR-Site12-A1    | CTGCAGATAACACGAGGGTAC  |
| XVR-Site12-A4    | CTCTCGCTGTCATACCTTACC  |
| XIII-L-Site12-A4 | CTTFACTCTCGCTGTCACTCC  |
| XVIR-Site12-A4   | CAAGCCCTGTTGTCTCTTACC  |
| VIIR-Site12-A4   | CAAGCCCTGTTGTCTCTTACC  |
| XVII-Gap 1-A1    | GGCACGAGTTATCCATTGCTG  |
| XVII-Gap 1-A4    | GCAAATGCACCAACAACACGG  |
| XIIIR-Gap 1-A1   | GCTAAAGTCCCATTGGTTGAC  |
| XIIIR-Gap 1-A4   | AGAAGTTCTCCTCGAGGATAG  |
| XIIIR-Site12-A1  | TAGAGTTGAGGGGATAGTGCC  |
| XIIIR-Site12-A4  | AACCACCATCCATCTCTCTAC  |
| YKU70-A1         | ACAACAGGTCACTTCTGCAAG  |
| YKU70-A4         | GGGACCCACAAAGTAATTGTC  |
| YKU80-A1         | GTAGCCTTGTGGCGCAATCG   |
| YKU80-A4         | CCTGTTTGTTCCTGGAAGTGC  |
| KanMX4-K2        | TTCAGAAACAACCTCTGGCGCA |
| KanMX4-K3        | CATCCTATGGAACTGCCTCGG  |

---

Each primer is named according to its target site. LEU2-M1 and LEU2-M2 were used for site directed mutagenesis of the *KIURA3-LEU2* cassette to generate the mutant heteroalleles *KIURA3-LEU2C* and *KIURA3-LEU2B*, respectively. All primers ending with F1 or R1 were used for generating cassettes by PCR, in order to carry out targeted gene disruptions or genomic integrations. The corresponding primers to determine genomic integration at the correct locus are shown immediately to the right. Primers ending with A1, were used in conjunction with U2 or K2 primers and primers ending with A4, were used in conjunction with U3 or K2 primers, respectively.
